# Supplementary material
Source: PubMed Central journal article supplement (PMC3306163)
Supplement: supp_WNL.0b013e318249f683_Coinvestigators.pdf [file supp_WNL.0b013e318249f683_Coinvestigators.pdf]

## **Appendix e-1**

### **HD-MAPS Co-Investigators:**

Alexandra Durr, MD,PhD (INSERM Hôpital de la Salpêtrière, Paris, France, HD-MAPS Investigator); Adam Rosenblatt, MD (Johns Hopkins University, USA, HD-MAPS Investigator); Luigi Frati, MD, PhD (University La Sapienza, Rome, Italy, HD-MAPS Investigator); Susan Perlman MD, (University of California Los Angeles, USA, HD-MAPS Investigator); Patrick M. Conneally, PhD (Indiana University School of Medicine, USA, HD-MAPS Investigator).

### **HD-MAPS Contributors:**

Mary Lou Klimek, MA, RN (University of Calgary, Canada, HD-MAPS Coordinator); Melissa Diggin, RN, MS, GNP (Boston University School of Medicine/Boston Medical Center, USA, HD-MAPS Coordinator); Tiffany Hadzi, MPH (Boston University School of Medicine/Boston Medical Center, USA, HD-MAPS Coordinator); Ayana Duckett, BA, (Columbia University Medical Center, USA, HD-MAPS Coordinator).

### **PREDICT-HD Contributors**

Anwar Ahmed, PhD (Cleveland Clinic Foundation, Cleveland, Ohio, USA, Site Investigator); Paul Allen, AASC (University of Iowa, Core IT/Management Section); David Ames, MD (The University of Melbourne, Kew, Victoria, Australia, Site Investigator); Christine Anderson, BA (University of Iowa, Core Recruitment/Retention Section); Karla Anderson, BS (University of Iowa, Program Management: Administrative); Karen Anderson, MD (University of Maryland, Psychiatric Section); Thomasin Andrews, MD, BSC, MRCP (National Hospital for Neurology

and Neurosurgery, London, UK, Site Staff); John Ashburner, PhD (Functional Imaging Lab, London, Imaging Section: Administrative); Eric Axelson, BSE (University of Iowa, Imaging Section: Administrative and Surface Analysis); Elizabeth Aylward, PhD (Seattle Children's Research Institute, Steering Committee and Imaging Section: Striatal Chair); Roger A. Barker, BA, MBBS, MRCP (Cambridge Centre for Brain Repair, Cambridge, UK, Site Investigator); Katrin Barth, RN (University of Ulm, Ulm, Germany, Site Staff); Stacey Barton, MSW, LCSW (Washington University, St. Louis, Missouri, USA, Site Staff); Kathleen Baynes, PhD (University of California Davis, Sacramento, California, USA, Site Investigator); Alexandra Bea, BA (Cleveland Clinic Foundation, Cleveland, Ohio, USA, Site Staff); Erik Beall, PhD (Cleveland Clinic, Imaging Section: fMRI); Mirza Faisal Beg, PhD (Simon Fraser University, Imaging Section: Shape Analysis); Leigh J. Beglinger, PhD (University of Iowa Hospitals and Clinics, Iowa City, Iowa, USA, Cognitive and Functional Assessment Sections); Kevin Biglan, MD (University of Rochester, Steering Committee and Motor Section co-Chair); Kristine Bjork, BA (University of Iowa, Program Management: Administrative); Steve Blanchard, MSHA (University of Iowa, Program Management: Financial, Co-Chair); Jeremy Bockholt, BS (University of Iowa, Imaging Section: Surface Analysis); Sudharshan Reddy Bommu, MS (University of Iowa, Core IT/Management Section); Bradley Brossman, MA (University of Iowa, Functional Assessment Section); Maggie Burrows, RN, BA (National Hospital for Neurology and Neurosurgery, London, UK, Site Staff); Vince Calhoun, PhD (University of New Mexico, Imaging Section: Administrative); Noelle Carlozzi, PhD (Kessler Medical Rehabilitation Research & Education Center, Functional Assessment Section.); Amy Chesire, LCSW-R, MSG (University of Rochester, Rochester, New York, USA, Site Staff); Edmond Chiu, MD (The University of Melbourne, Kew, Victoria, Australia, Site Investigator); Phyllis Chua, MD (The

University of Melbourne, Kew, Victoria, Australia, Site Investigator); R.J. Connell, BS (University of Iowa, Core IT/Management Section); Carmela Connor, BP, MP, DP (Neurosciences Unit, Graylands, Selby-Lemnos & Special Care Health Services, Perth, Australia, Site Staff); Jody Corey-Bloom, MD, PhD (University of California, San Diego, Motor Section co-Chair); David Craufurd, MD (University of Manchester, UK, Site Investigator and Psychiatric Section); Stephen Cross, BA (University of Iowa Hospitals and Clinics, Iowa City, Iowa, USA, Site Staff); Lucette Cysique, PhD (St. Vincent's/University of Melbourne, Australia, Cognitive Section); Rachelle Dar Santos, BSc (University of British Columbia, Vancouver, British Columbia, Canada, Site Staff); Jennifer Davis, PhD (Scientific Consultants, Alpert Medical School of Brown University, Cognitive Section); Joji Decolongon, MSc (University of British Columbia, Vancouver, British Columbia, Canada, Site Staff); Anna DiPietro (Cambridge Centre for Brain Repair, Cambridge, UK, Site Staff); Nicholas Doucette, BA (University of Iowa Hospitals and Clinics, Iowa City, Iowa, USA, Core Recruitment/Retention Section); Nancy Downing, RN, MSN (University of Iowa, Psychiatric Section); Ann Dudler (University of Iowa, Program Management: Administrative); Steve Dunn, BA (University of Iowa; Imaging Section: Administrative); Daniel Ecker, MD (University of Ulm, Ulm, Germany, Site Investigator); Eric A. Epping, MD, PhD (University of Iowa Hospitals and Clinics, Iowa City, Iowa, USA, Steering Committee, Psychiatric Section Chair and Core Ethics Section); Diane Erickson, RN (Colorado Neurological Institute, Englewood, Colorado, USA, Site Staff); Cheryl Erwin, JD, PhD (McGovern Center for Health, Humanities and the Human Spirit, Core Ethics Section Chair); Ken Evans, PhD (Ontario Cancer Biomarker Network, BioMarkers and Psychiatric Sections); Stewart A. Factor, DO (Emory University School of Medicine, Atlanta, Georgia, USA, Site Investigator); Sarah Farias, PhD (University of California, Davis, Functional Assessment

Section); Marta Fatas, BA (Hospital Ramón y Cajal, Madrid, Spain, Site Staff); Jess Fiedorowicz, MD (University of Iowa, Psychiatric Section); Ruth Fullam, BSC (University of Manchester, Manchester, UK, Site Staff); Sarah Furtado, MD, PhD, FRCPC (University of Calgary, Calgary, Alberta, Canada, Site Investigator); Monica Bascunana Garde (Hospital Ramón y Cajal, Madrid, Spain, Site Staff); Carissa Gehl, PhD (VA Medical Center, Iowa City, IA, Cognitive and Functional Assessment Sections); Michael D. Geschwind, MD, PhD (University of California San Francisco, California, USA, Site Investigator and Motor Section); Anita Goh, D.Psych (The University of Melbourne, Kew, Victoria, Australia, Site Staff); Jon Gooblar, BA (University of California San Francisco, California, USA, Site Staff); Anna Goodman, PhD (Cambridge Centre for Brain Repair, Cambridge, UK, Site Staff); Jane Griffith, RN (Westmead Hospital, Sydney, Australia, Site Staff); Mark Groves, MD (Columbia University, Psychiatric Section); Mark Guttman, MD (Centre for Addiction and Mental Health, University of Toronto, Markham, Ontario, Canada, Site Investigator); Joanne Hamilton, PhD (University of California, San Diego, Cognitive Section); Deborah Harrington, PhD (University of California, San Diego, Cognitive Section Chair); Greg Harris, BS (University of Iowa, Imaging Section: Administrative); Robert K. Heaton, PhD (University of California, San Diego, Cognitive Section); Karl Helmer, PhD (Massachusetts General Hospital, Imaging Section: DTI); Mabelle Henneberry (University of Iowa, Program Management: Financial); Tamara Hershey, PhD (Washington University Cognitive Science Battery Development, Cognitive Section); Kelly Herwig, BA, MS (University of Iowa, Core Recruitment/Retention Section); Elizabeth Howard, MD (University of Manchester, Manchester, UK, Site Investigator); Christine Hunter, RN, CCRC (Baylor College of Medicine, Houston, Texas, USA, Site Staff); Joseph Jankovic, MD (Baylor College of Medicine, Houston, Texas, USA, Site Investigator); Hans Johnson, PhD (University of Iowa

Hospitals and Clinics, Iowa City, IA, Steering Committee and Core IT/Management Section Chair); Arik Johnson, PsyD (University of California, Los Angeles Medical Center, Los Angeles, California, USA, Site Investigator); Kathy Jones, BS (University of Iowa, Imaging Section: Administrative); Andrew Juhl, BS (University of Iowa Hospitals and Clinics, Iowa City, Iowa, USA, Site Staff); Eun Young Kim, MS (University of Iowa, Imaging Section: Administrative); Mycah Kimble, BA (University of Iowa, Core Recruitment/Retention Section); Pamela King, BScN, RN (University of Alberta, Edmonton, Alberta, Canada, Site Staff); Mary Lou Klimek, RN, BN, MA (University of Calgary, Calgary, Alberta, Canada, Site Coordinator); Stefan Klöppel, MD (National Hospital for Neurology and Neurosurgery, London, UK, Site Investigator); Katherine Koenig, PhD (Cleveland Clinic, Imaging Section: fMRI); Angela Komiti, BS, MA (The University of Melbourne, Kew, Victoria, Australia, Site Staff); Rajeev Kumar, MD (Colorado Neurological Institute, Englewood, Colorado, USA, Site Investigator); Douglas Langbehn, MD, PhD (University of Iowa, Steering Committee and Core Statistics Section Chair); Blair Leavitt, MDCM, FRCPC (University of British Columbia, Steering Committee and BioMarkers Section Chair); Anne Leserman, MSW, LISW (University of Iowa, Functional Assessment and Core Recruitment/Retention Sections); Kelvin Lim, MD (University of Ulm, Germany, Imaging Section: DTI); Hillary Lipe, ARNP (University of Washington and VA Puget Sound Health Care System, Seattle, Washington, USA, Site Staff); Mark Lowe, PhD (Cleveland Clinic, Imaging Section: fMRI and DTI); Vincent A. Magnotta, PhD (University of Iowa, Imaging Section: DTI Chair); William M. Mallonee, MD (Hereditary Neurological Disease Centre, Wichita, Kansas, USA, Site Investigator); Nicole Mans, BA, MS (University of California Davis, Sacramento, California, USA, Site Staff); Jacquie Marietta, BS (University of Iowa, Imaging Section: Administrative); Frederick Marshall, MD (University of Rochester,

Rochester, New York, USA, Site Investigator); Wayne Martin, MD (University of Alberta, Edmonton, Alberta, Canada, Site Investigator); Sarah Mason, BSC (Cambridge Centre for Brain Repair, Cambridge, UK, Site Staff); Kirsty Matheson (University of Aberdeen, Cognitive Section); Wayne Matson, PhD (VA Medical Center, Bedford, MA, BioMarkers Section); Pietro Mazzoni, MD, PhD (Columbia University Medical Center, New York, New York, USA, Site Investigator); William McDowell, AA (University of Iowa, Imaging Section: Administrative); Zosia Miedzybrodzka, PhD (Clinical Genetics Centre, Aberdeen, Scotland, UK, Site Investigator); Michael Miller, PhD (Johns Hopkins University, Imaging Section: Shape Analysis); James Mills, MEd, MS (University of Iowa, Core Statistics Section); Dawn Miracle, BS, MS (Colorado Neurological Institute, Englewood, Colorado, USA, Site Staff); Kelsey Montross, BA (University of Iowa, Program Management: Financial); David Moore, PhD (University of California, San Diego, Cognitive Section); Sasumu Mori, PhD (Johns Hopkins University, Imaging Section: DTI); David J. Moser, PhD (University of Iowa, Cognitive Section); Carol Moskowitz, MS (Columbia University Medical Center, New York, New York, USA, Site Coordinator); Emily Newman, BA (Cleveland Clinic Foundation, Cleveland, Ohio, USA); Peg Nopoulos, MD (University of Iowa, Imaging Section: Surface Analysis Chair); Marianne Novak, MD (National Hospital for Neurology and Neurosurgery, London, UK, Site Investigator); Justin O'Rourke, MA (University of Iowa, Functional Assessment Section); David Oakes, PhD (University of Rochester, Core Statistics Section); William Ondo, MD (Baylor College of Medicine, Houston, Texas, USA, Site Investigator); Michael Orth MD, PhD (University of Ulm, Ulm, Germany, Site Investigator); Peter Panegyres, MB, BS, PhD (Neurosciences Unit, Graylands, Selby-Lemnos & Special Care Health Services, Perth, Australia, Site Investigator); Karen Pease, BS (University of Iowa, Core IT/Management Section); Susan

Perlman, MD (University of California, Los Angeles Medical Center, Los Angeles, California, USA, Site Investigator); Joel Perlmutter, MD (Washington University, St. Louis, Missouri, USA, Site Investigator); Asa Peterson, MD, PhD (Lund University, Sweden, BioMarkers Section); Michael Phillips, MD (Cleveland Clinic, Imaging Section: fMRI); Ron Pierson, PhD (University of Iowa, Imaging Section: Administrative Chair); Steve Potkin, MD (University of California, Irvine, Imaging Section: Administrative); Joy Preston (The University of Melbourne, Kew, Victoria, Australia, Site Staff); Kimberly Quaid, PhD (Indiana University School of Medicine, Indianapolis, IN, Site Investigator); Dawn Radtke, RN (Hennepin County Medical Center, Minneapolis, Minnesota, USA, Site Coordinator); Daniela Rae, RN (Clinical Genetics Centre, Aberdeen, Scotland, UK, Site Staff); Stephen Rao, PhD (Cleveland Clinic Foundation, Cleveland, Ohio, USA, Site Investigator and Imaging Section: fMRI Chair); Lynn Raymond, MD, PhD (University of British Columbia, Vancouver, British Columbia, Canada, Site Investigator); Sarah Reading, MD (Johns Hopkins University, Imaging Section: Shape Analysis); Rebecca Ready, PhD (University of Massachusetts, Functional Assessment Section); Christine Reece, BS (Cleveland Clinic, Site Coordinator and Imaging Section: fMRI); Ralf Reilmann, MD (Muenster, Germany, Motor Section); Norm Reynolds, MD (University of Wisconsin, Milwaukee, Core Recruitment/Retention Section); Kylie Richardson, PhD (Westmead Hospital, Sydney, Australia, Site Staff); Hugh Rickards, MD (Queen Elizabeth Psychiatric Hospital, Psychiatric Section); Eunyoe Ro, MA (University of Iowa, Functional Assessment Section); Robert Robinson, MD (University of Iowa, Psychiatric Section); Robert Rodnitzky, MD (University of Iowa Hospitals and Clinics, Iowa City, Iowa, USA, Site Investigator); Ben Rogers, BA, BSCS (University of Iowa, Core IT/Management Section); Adam Rosenblatt, MD (Johns Hopkins University, Baltimore, Maryland, USA, Site Investigator); Elisabeth Rosser, MBBS, FRCP (National

Hospital for Neurology and Neurosurgery, London, UK, Site Investigator); Anne Rosser, MD, PhD, MRCP and Kathy Price, RN (Cardiff University, Cardiff, Wales, UK, Site Investigator); Kathy Price RN(Cardiff University, Cardiff, Wales, UK, Site Coordinator); Pat Ryan, MSW, LISW, MA (University of Iowa, Core Recruitment/Retention Section); David Salmon, PhD (University of California, San Diego, Cognitive Section); Ali Samii, MD (University of Washington and VA Puget Sound Health Care System, Seattle, Washington, USA, Site Investigator ); Jamy Schumacher (University of Iowa, Program Management: Administrative); Jessica Schumacher, BA (University of Iowa, Core Recruitment/Retention Section); Jose Luis López Sendon, MD (Hospital Ramón y Cajal, Madrid, Spain, Site Investigator); Paula Shear, PhD (University of Cincinnati, Cognitive Section); Alanna Sheinberg, BA (Centre for Addiction and Mental Health, University of Toronto, Markham, Ontario, Canada, Site Staff); Barnett Shpritz, BS, MA, OD (Johns Hopkins University, Baltimore, Maryland, USA, Site Staff); Karen Siedlecki, PhD (Fordham University, Cognitive Section); Sheila A. Simpson, MD (Clinical Genetics Centre, Aberdeen, Scotland, UK, Site Investigator); Adam Singer (Centre for Addiction and Mental Health, University of Toronto, Markham, Ontario, Canada, Site Staff); Jim Smith, AS (University of Iowa, Core IT/Management Section); Megan Smith, PhD (University of Iowa Hospitals and Clinics, Iowa City, IA Steering Committee, Cognitive Section: Chair Administration and Psychiatric Section); Glenn Smith, PhD (Mayo Clinic, Cognitive Section); Pete Snyder, PhD (Scientific Consultants, Alpert Medical School of Brown University, Cognitive Section); Allen Song, PhD (Duke University, Imaging Section: DTI, Site Staff); Satwinder Sran, BSC (University of Alberta, Edmonton, Alberta, Canada); Klaas Stephan, MD, PhD (University College of London, Imaging Section: Administrative); Janice Stober, BA, BSW (Centre for Addiction and Mental Health, University of Toronto, Markham, Ontario, Canada,

Site Staff); Sigurd Sü?muth, MD, RN (University of Ulm, Ulm, Germany, Site Staff); Greg Suter, BA (Hereditary Neurological Disease Centre, Wichita, Kansas, USA, Site Coordinator); Sarah Tabrizi, PhD (National Hospital for Neurology and Neurology and Neurosurgery, London, Site Investigator and BioMarkers Section); Terry Tempkin, RNC, MSN (University of California Davis, Sacramento, California, USA, Site Coordinator); Claudia Testa, MD, PhD (Emory University School of Medicine, Atlanta, Georgia, USA, Site Investigator); Sean Thompson, BA (University of Iowa, Program Management: Administrative); Teri Thomsen, MD (University of Iowa Hospitals and Clinics, Iowa City, Iowa, USA, Site Investigator); Kelli Thumma, BA (University of Iowa, Core Recruitment/Retention Section); Arthur Toga, PhD (University of California, Los Angeles, Imaging Section: Administrative); Sonja Trautmann, RN (University of Ulm, Ulm, Germany, Site Staff); Geoff Tremont, PhD, MS (Scientific Consultants, Alpert Medical School of Brown University, Cognitive Section); , David Tupper, PhD (Hennepin County Medical Center, Minneapolis, Minnesota, USA, Site Staff); Jessica Turner, PhD (University of California, Irvine, Imaging Section: DTI); Ergun Uc, MD, BA (University of Iowa Hospitals and Clinics, Iowa City, Iowa, USA, Site Investigator); Anthony Vaccarino, PhD (Ontario Cancer Biomarker Network, Psychiatric and Functional Assessment Sections); Eric van Duijn, MD (Leiden University Medical Center, Netherlands, Psychiatric Section); Marleen Van Walsem, MSc (Rikshospitalet, Oslo, Norway, Cognitive Section); Stacie Vik, BA (University of Iowa, Core Recruitment/Retention Section); Jean Paul Vonsattel, PhD (Columbia University Medical Center, New York, NY, Steering Committee); Elizabeth Vuletich, BSC (Neurosciences Unit, Graylands, Selby-Lemnos & Special Care Health Services, Perth, Australia, Site Staff); Tom Warner, MD, PhD (National Hospital for Neurology and Neurosurgery, London, UK, Site Investigator); Paula Wasserman, MA (Columbia University Medical Center, New York, New

York, USA, Site Staff); Thomas Wassink, MD (University of Iowa, Site Investigator and Genetics Section, Co-Chair); Elijah Waterman, BA (University of Iowa, Core Recruitment/Retention Section); Kurt Weaver, PhD (University of Washington and VA Puget Sound Health Care System, Seattle, Washington, USA, Site Investigator and Imaging Section: Striatal); David Weir, BSc (University of British Columbia, Vancouver, British Columbia, Canada, Site Staff); Claire Welsh (Johns Hopkins University, Baltimore, Maryland, USA, Site Staff); Chris Werling-Witkoske (University of Iowa, Program Management: Administrative, Chair); Melissa Wesson, MS (Indiana University School of Medicine, Indianapolis, IN, Site Staff); Holly Westervelt, PhD (Alpert Medical School of Brown University, Cognitive Section Chair, Quality Control and Training); Patrick Weydt, MD (University of Ulm, Ulm, Germany, Site Investigator); Vicki Wheelock, MD (University of California Davis, Sacramento, California, USA, Site Investigator); Kent Williams, BSA, MCS, MS (University of Iowa, Core IT/Management Section); Janet Williams, PhD (University of Iowa, Steering Committee, Functional Assessment Section, Co-Chair and Core Ethics Section); Mary Wodarski, BA (University of Rochester, Rochester, New York, USA, Site Staff); Joanne Wojcieszek, MD (Indiana University School of Medicine, Indianapolis, IN, Site Investigator); Jessica Wood, MD, PhD (University of Iowa Hospitals and Clinics, Iowa City, Iowa, USA, Site Investigator); Cathy Wood-Siverio, MS (Emory University School of Medicine, Atlanta, Georgia, USA, Site Staff); Shuhua Wu, MCS (University of Iowa, Core IT/Management Section); Olga Yastrubetskaya, PhD (The University of Melbourne, Kew, Victoria, Australia, Site Investigator); Justo Garcia de Yebenes, MD (Hospital Ramón y Cajal, Madrid, Spain, Site Investigator); Yong Qiang Zhao, PhD (University of Iowa, Imaging Section: Administrative); Janice Zimbelman, PhD, PT

(Cleveland Clinic, Imaging Section: fMRI); Roland Zschiegner (University of Iowa, Core IT/Management Section).

### **EHDN Registry Contributors**

Olaf Aaserud (Oslo University Hospital (Rikshospitalet), Norway, Site Staff); Giovanni Abbruzzese, MD (Università di Genova, Italy, Site Investigator); Thomasin Andrews, PhD (The National Hospital for Neurology and Neurosurgery, London, UK, Site Investigator); Jurgin Andrich, MD (Huntington-Zentrum (NRW) Bochum im St. Josef-Hospital, Germany, Site Investigator); Jakub Antczak (Institute of Psychiatry and Neurology Warsaw-IPiN, Poland, Site Investigator); Natalie Arran (Centre and Central Manchester University Hospitals NHS Foundation Trust University of Manchester/Manchester Academic Health Sciences, UK, Site Staff); Maria J. Saiz Artiga, PhD (Madrid-Fundación Jiménez Díaz, Spain, Site Staff); Anne-Catherine Bachoud-Lévi, MD, PhD (Centre de référence maladie de Huntington, Groupe Hospitalier Chenevier-Mondor, Créteil, France, Steering Committee); Krysztof Banaszkiwicz, MD (Krakowska Akademia Neurologii, Poland, Site Investigator); Monica Bandettini di Poggio (Università di Genova, Italy, Site Investigator); Oliver Bandmann, MD, PhD (The Royal Hallamshire Hospital/Sheffield Children's Hospital, UK, Site Investigator); Miguel A. Barbera (Hospital Mútua de Terrassa Barcelona, Spain, Site Staff); Roger A. Barker, PhD, MRCP (Cambridge Centre for Brain Repair, UK, Site Investigator); Francisco Barrero (Hospital Universitario San Cecili, Spain, Site Staff); Katrin Barth, RN (Universitätsklinikum Ulm, Germany, Steering Committee and Site Staff); Jordi Bas, MD, PhD (Hospital Universitari de Bellvitge Barcelona, Spain, Site Investigator); Antoine Beister (Universitätsklinikum Münster, Germany, Site Staff); Anna Rita Bentivoglio, MD, (Istituto di Neurobiologia e Medicina

Molecolare & Istituto di Scienze e Tecnologie della Cognizione /CNR Istituto di Neurologia Università Cattolica Roma, Italy, Steering Committee and Site Investigator); Elisabetta Bertini, MD (Universita' degli Studi di Firenze /Azienda Ospedaliera, Italy, Site Staff); Ida Biunno (Consiglio Nazionale delle Ricerche, Italy, Steering Committee); Kathrine Bjørgo (Oslo University Hospital (Ulleval), Norway, Site Staff); Inga Bjørnevoll (St. Olavs Hospital Trondheim, Norway, Site Investigator); Stefan Bohlen (Universitätsklinikum Münster, Germany, Site Staff); Raphael M. Bonelli, MD, (LKH Graz Abteilung für Psychiatrie, Austria, Steering Committee and Site Investigator); Reineke Bos, MSc (Leiden University Medical Centre, Netherlands, Site Coordinator and Language coordinator); Colin Bourne (Leicestershire Partnership Trust Mill Lodge, UK, Site Staff); Alyson Bradbury (The Royal Hallamshire Hospital/Sheffield Children's Hospital, UK, Site Staff); Peter Brockie (Scottish Huntington's Association Whyteman's Brae Hospital Fife, UK, Site Staff); Felicity Brown (Abercromby Center Glasgow, UK, Site Staff); Stefania Bruno (The National Hospital for Neurology and Neurosurgery, London, UK, Site Staff); Anna Bryl, MD (Medical University of Poznan, Poland, Site Investigator); Andrea Buck, MD (Universitätsklinikum Ulm, Germany, Site Staff); Sabrina Burg (Universitätsklinikum Ulm, Germany, Language coordinator); Jean-Marc Burgunder, MD (Swiss HD Centre Gümliigen Bern, Switzerland, Steering Committee and Site Investigator); Peter Burns (Gloucestershire Royal Hospital, UK, Site Staff); Liz Burrows (Abercromby Center Glasgow, UK, Site Staff); Nuria Busquets (Hospital Universitari de Bellvitge Barcelona, Spain, Site Staff); Monica Busse (The Institute of Medical Genetics/University Hospital of Wales, UK, Site Staff); Matilde Calopa (Hospital Universitari de Bellvitge Barcelona, Spain, Site Staff); Gemma T. Carruesco (Hospital Mútua de Terrassa Barcelona, Spain, Site Staff); Ana Gonzalez Casado (Hospital Mare de Deu de La Merced Barcelona, Spain, Site Staff); Judit López Catena

(Hospital Mútua de Terrassa Barcelona, Spain, Site Staff); Carol Chu (Castle Hill Hospital Hull and Chapel Allerton Hospital Leeds, UK, Site Staff); Anna Ciesielska (Medical University of Poznan, Poland, Site Staff); Jackie Clapton (Leicestershire Partnership Trust Mill Lodge, UK, Site Staff); Carole Clayton (Leicestershire Partnership Trust Mill Lodge, UK, Site Coordinator); Catherine Clenaghan (The Institute of Medical Genetics/University Hospital of Wales, UK, Site Staff); Miguel Coelho, MS (Hospital de Santa Maria/Instituto de Medicina Molecular Lisbon, Portugal, Site Staff); Julia Connemann (Universitätsklinikum Ulm, Germany, Site Staff); David Craufurd, MD (Centre and Central Manchester University Hospitals NHS Foundation Trust University of Manchester/Manchester Academic Health Sciences, UK, Site Investigator); Jenny Crooks (The Barberry Centre Birmingham, UK, Site Staff); Patricia Trigo Cubillo (Hospital Ramón y Cajal Madrid, Spain, Language coordinator); Esther Cubo, MD, PhD (Hospital General Yagüe Burgos Granada, Spain, Site Investigator); Adrienne Curtis, PhD (The Barberry Centre Birmingham, UK, Site Investigator); Giuseppe De Michele, MD (Azienda Ospedaliera Universitaria Federico II Naples, Italy, Site Investigator); A. De Nicola (Neurogenetics and Rare Disease Centre Pozzilli, Italy, Site Staff); Jenny de Souza (Keylock) (The Barberry Centre Birmingham, UK, Site Staff); A. Marit de Weert (Polikliniek Neurologie Groningen, Netherlands, Site Staff); Justo Garcia de Yébenes, MD (Hospital Ramón y Cajal Madrid, Spain, Site Investigator); M. Dekker, MD (Polikliniek Neurologie Groningen, Netherlands, Site Investigator); A. Martínez Descals (Fundación Jiménez Díaz, Madrid, Spain, Language coordinator); Luigi Di Maio (Azienda Ospedaliera Universitaria Federico II Naples, Italy, Site Investigator); Anna Di Pietro (Cambridge Centre for Brain Repair, UK, Site Staff); Heather Dipple (Leicestershire Partnership Trust Mill Lodge, UK, Site Staff); Matthias Dose (Isar-Amper-Klinikum Taufkirchen, Germany, Site Investigator); Eve M. Dumas (Leiden University

Medical Centre, Netherlands, Site Staff); Stephen Dunnett (The Institute of Medical Genetics/University Hospital of Wales, UK, Steering Committee); Daniel Ecker, MD (Universitätsklinikum Ulm, Germany, Site Staff); F. Elifani (Neurogenetics and Rare Disease Centre Pozzilli, Italy, Site Staff); Lynda Ellison-Rose (The Institute of Medical Genetics/University Hospital of Wales, UK, Site Staff); Marina D. Elorza (Hospital Mare de Deu de La Merced Barcelona, Spain, Site Staff); Carolin Eschenbach (Universitätsklinikum Ulm, Germany, Site Coordinator); Carole Evans, PhD (Castle Hill Hospital Hull, UK, Site Staff); Helen Fairtlough (The Royal Hallamshire Hospital/Sheffield Children's Hospital, UK, Site Staff); Madelein Fannemel (Oslo University Hospital (Ullevål), Norway, Site Staff); Alfonso Fasano (Istituto di Neurobiologia e Medicina Molecolare & Istituto di Scienze e Tecnologie della Cognizione /CNR Istituto di Neurologia Università Cattolica Roma, Italy, Site Staff); Maria Fenollar (Hospital Clínico Universitario San Carlos Madrid-Clinico, Spain, Site Staff); Giovanna Ferrandes (Università di Genova, Italy, Site Investigator); Joaquim J. Ferreira (Hospital de Santa Maria/Instituto de Medicina Molecular Lisbon, Portugal, Steering Committee and Site Investigator); Kay Fillingham (The Royal Hallamshire Hospital/Sheffield Children's Hospital, UK, Site Staff); Ana Maria Finisterra (Portugal, Language coordinator); K. Fisher (Cambridge Centre for Brain Repair, UK, Site Staff); Amy Fletcher, BSc (Gloucestershire Royal Hospital, UK, Site Staff); Jillian Foster, BA (Scottish Huntington's Association Whyteman's Brae Hospital Fife, UK, Site Coordinator); Isabella Foustanos (The Royal Hallamshire Hospital/Sheffield Children's Hospital, UK, Site Staff); Fernando A. Frech (Madrid-Fundación Jiménez Díaz, Spain, Site Staff); Robert Fullam (Centre and Central Manchester University Hospitals NHS Foundation Trust University of Manchester/Manchester Academic Health Sciences, UK, Site Staff); Ruth Fullham (The Institute of Medical Genetics/University Hospital of Wales, UK, Site

Staff); Miguel Gago, MD (Faculdade de Medicina da Universidade do Porto/Hospital de São João, Portugal, Site Investigator); Rocio García-Ramos García (Hospital Clínico Universitario San Carlos Madrid-Clinico, Spain, Site Staff); Socorro S. García (Hospital Mare de Deu de La Merced Barcelona, Spain, Site Staff); Carolina Garrett (Faculdade de Medicina da Universidade do Porto/Hospital de São João, Portugal, Site Investigator); Cinzia Gellera (Fondazione IRCCS Istituto Neurologico Carlo Besta Milan, Italy, Site Staff); Paul Gill (The Royal Hallamshire Hospital/Sheffield Children's Hospital, UK, Site Staff); Andrea Ginestroni, MD (Universita' degli Studi di Firenze /Azienda Ospedaliera, Italy, Site Staff); Charlotte Golding (The National Hospital for Neurology and Neurosurgery, London, UK, Site Staff); Anna Goodman (Cambridge Centre for Brain Repair, UK, Site Staff); Per Gørvell (Oslo University Hospital (Ullevål), Norway, Site Staff); Janet Grant, MD (Leicestershire Partnership Trust Mill Lodge, UK, Site Investigator); A. Griguoli (Neurogenetics and Rare Disease Centre Pozzilli, Italy, Site Staff); Diana Gross, MD (Leicestershire Partnership Trust Mill Lodge, UK, Site Investigator); Leonor Guedes (Hospital de Santa Maria/Instituto de Medicina Molecular Lisbon, Portugal, Language coordinator); Monica BascuñanaGuerra (Hospital Ramón y Cajal Madrid, Spain, Language coordinator); Maria Rosalia Guerra (Faculdade de Medicina da Universidade do Porto/Hospital de São João, Portugal, Site Staff); Rosa Guerrero (Madrid-Fundación Jiménez Díaz, Spain, Site Staff); Dolores B. Guia (Hospital Mútua de Terrassa Barcelona, Spain, Site Staff); Arianna Guidubaldi (Istituto di Neurobiologia e Medicina Molecolare & Istituto di Scienze e Tecnologie della Cognizione /CNR Istituto di Neurologia Università Cattolica Roma, Italy, Site Staff); Caroline Hallam (Leicestershire Partnership Trust Mill Lodge, UK, Site Staff); Stephanie Hamer (Castle Hill Hospital Hull, UK, Site Staff); Kathrin Hammer, RAEET (Isar-Amper-Klinikum Taufkirchen, Germany, Site Staff); Olivia J. Handley (University College London, UK, Steering

Committee and Language Coordinator); Alison Harding (Gloucestershire Royal Hospital, UK, Site Staff); Lis Hasholt (Hukommelsesklinikken Rigshospitalet Panum Institutet Copenhagen, Denmark, Site Investigator); Reikha Hedge (Abercromby Center Glasgow, UK, Site Staff); Arvid Heiberg (Oslo University Hospital (Rikshospitalet), Norway, Steering Committee and Site Investigator); Walburgis Heinicke (Psychatrium Heiligenhafen, Germany, Site Investigator); Christine Held (Universitätsklinikum Ulm, Germany, Language coordinator); Laura Casas Hernanz (Hospital Mútua de Terrassa Barcelona, Spain, Site Staff); Briggitte Herranhof (LKH Graz Abteilung für Psychiatrie, Austria, Site Staff); Carmen Durán Herrera (Hospital Infanta Cristina Badajoz, Spain, Site Staff); Ute Hidding (Universitätsklinikum Hamburg-Eppendorf/Klinik und Poliklinik für, Germany, Site Staff); Heli Hiivola (Rehabilitation Centre Suvituuli Turku-Suvituuli, Finland, Site Staff); Susan Hill (Cambridge Centre for Brain Repair, UK, Site Staff); Lena .E. Hjermind (Hukommelsesklinikken Rigshospitalet Panum Institutet Copenhagen, Denmark, Site Staff); Emma Hobson (Chapel Allerton Hospital Leeds, UK, Site Staff); Rainer Hoffmann, MD (Huntington-Zentrum (NRW) Bochum im St. Josef-Hospital, Germany, Site Investigator); Anna Hödl Holl (LKH Graz Abteilung für Psychiatrie, Austria, Site Investigator); Liz Howard (Centre and Central Manchester University Hospitals NHS Foundation Trust University of Manchester/Manchester Academic Health Sciences, UK, Site Investigator); Sarah Hunt, MRCP (The Institute of Medical Genetics/University Hospital of Wales, UK, Site Staff); Susan Huson, MD, FRCP (Centre and Central Manchester University Hospitals NHS Foundation Trust University of Manchester/Manchester Academic Health Sciences, UK, Site Investigator); Tamara Ialongo (Istituto di Neurobiologia e Medicina Molecolare & Istituto di Scienze e Tecnologie della Cognizione /CNR Istituto di Neurologia Università Cattolica Roma, Italy, Site Staff); Jesus Miguel R. Idiago (Hospital Mare de Deu de

La Merced Barcelona, Spain, Site Staff); Torsten Illmann (EHDN Central Coordination, Germany, Steering Committee); Katarzyna Jachinska (Institute of Psychiatry and Neurology Warsaw-IPiN, Poland, Site Investigator); Gioia Jacopini (Istituto di Neurobiologia e Medicina Molecolare & Istituto di Scienze e Tecnologie della Cognizione /CNR Istituto di Neurologia Università Cattolica Roma, Italy, Site Investigator); Oda Jakobsen (Hukommelsesklippen Rigshospitalet Panum Institutet Copenhagen, Denmark, Site Staff); Stuart Jamieson (Chapel Allerton Hospital Leeds, UK, Site Staff); Zygmunt Jamrozik (Medical University of Warsaw, Poland, Site Investigator); Piotr Janik (Medical University of Warsaw, Poland, Site Investigator); Nicola Johns (Scottish Huntington's Association Whyteman's Brae Hospital Fife, UK, Site Staff); Lesley Jones (The Institute of Medical Genetics/University Hospital of Wales, UK, Site Investigator); Una Jones (The Institute of Medical Genetics/University Hospital of Wales, UK, Site Staff); Caroline K. Jurgens, MSc (Leiden University Medical Centre, Netherlands, Site Staff); Alain Kaelin, MD (Neurologische Klinik und Poliklinik/Zentrum für Bewegungsstörungen, Switzerland, Site Investigator); Anna Kalbarczyk (Medical University of Warsaw, Poland, Site Staff); Ann Kershaw (Cambridge Centre for Brain Repair, UK, Site Staff); Hanan Khalil (The Institute of Medical Genetics/University Hospital of Wales, UK, Site Staff); Janina Kieni (Isar-Amper-Klinikum Taufkirchen, Germany, Site Staff); Aneta Klimberg (Medical University of Poznan, Poland, Site Staff); Susana P. Koivisto (Oslo University Hospital (Rikshospitalet), Norway, Language coordinator); Kerstin Koppers (France, Language coordinator); Christoph Michael Kosinski (Universitätsklinikum Aachen Neurologische Klinik, Germany, Site Staff); Malgorzata Krawczyk, MD (Krakowska Akademia Neurologii, Poland, Site Investigator); Berry Kremer, MD, PhD (Universitair Medisch Centrum St. Radboud Nijmegen, Netherlands, Site Investigator); Wioletta Krysa (Institute of Psychiatry and Neurology

Warsaw-IPiN, Poland, Site Staff); Hubert Kwiecinski (Medical University of Warsaw, Poland, Site Investigator); Nayana Lahiri (The National Hospital for Neurology and Neurosurgery, London, UK, Site Staff); Johann Lambeck (Universitätsklinik Freiburg, Germany, Site Staff); Herwig Lange (Reha Zentrum in Dinslaken im Gesundheitszentrums Lang Dinslaken and Universitätsklinikum Münster, Germany, Site Investigator); Fiona Laver (Gloucestershire Royal Hospital, UK, Site Staff); K.L. Leenders (Polikliniek Neurologie Groningen, Netherlands, Site Staff); Jamie Levey (EHDN Central Coordination, France, Steering Committee); Gabriele Leythaeuser (Isar-Amper-Klinikum Taufkirchen, Germany, Site Staff); Franziska Lezius (Universitätsklinikum Ulm, Germany, Site Staff); Joan Roig Llesoy (Hospital Mare de Deu de La Merced Barcelona, Spain, Site Staff); Matthias Löhle (Reha Zentrum in Dinslaken im Gesundheitszentrums Lang Dinslaken, Germany, Site Staff); Cristobal Diez-Aja López (Hospital Mare de Deu de La Merced Barcelona, Spain, Site Staff); Fortuna Lorenza (Hospital Universitario Virgen de la Arrixaca Murcia, Spain, Site Staff); Giovanna Loria (Istituto di Neurobiologia e Medicina Molecolare & Istituto di Scienze e Tecnologie della Cognizione /CNR Istituto di Neurologia Università Cattolica Roma, Italy, Site Staff); Markus Magnet (LKH Graz Abteilung für Psychiatrie, Austria, Site Staff); Paola Mandich (Università di Genova, Italy, Site Investigator); Roberta Marchese (Università di Genova, Italy, Site Investigator); Jerzy Marcinkowski, MD (Medical University of Poznan, Poland, Site Investigator); Caterina Mariotti (Fondazione IRCCS Istituto Neurologico Carlo Besta Milan, Italy, Site Staff); Natividad Mariscal (Hospital General Yagüe Burgos Granada, Spain, Site Staff); Ivana Markova (Castle Hill Hospital Hull, UK, Site Staff); Ralf Marquard (Isar-Amper-Klinikum Taufkirchen, Germany, Site Staff); Kirsti Martikainen (Rehabilitation Centre Suvituuli Turku-Suvituuli, Finland, Site Investigator); Isabel Haro Martínez (Hospital Mare de Deu de La Merced Barcelona, Spain, Site

Staff); Asuncion Martínez-Descals (Madrid-Fundación Jiménez Díaz, Spain, Site Staff); T. Martino (Neurogenetics and Rare Disease Centre Pozzilli, Italy, Site Staff); Sarah Mason (Cambridge Centre for Brain Repair, UK, Site Staff); Sue McKenzie (Scottish Huntington's Association Whyteman's Brae Hospital Fife, UK, Site Investigator); Claudia Mechi (Universita' degli Studi di Firenze /Azienda Ospedaliera, Italy, Site Staff); Tiago Mendes (Hospital de Santa Maria/Instituto de Medicina Molecular Lisbon, Portugal, Site Staff); Tiago Mestre (Hospital de Santa Maria/Instituto de Medicina Molecular Lisbon, Portugal, Language coordinator); Julia Middleton (Leicestershire Partnership Trust Mill Lodge, UK, Site Staff); Eva Milkereit (Universitätsklinikum Aachen Neurologische Klinik, Germany, Site Staff); Joanne Miller, PhD (Abercromby Center Glasgow, UK, Site Staff); Julie Miller, PhD (Castle Hill Hospital Hull, UK, Site Staff); Sara Minster (The Institute of Medical Genetics/University Hospital of Wales, UK, Language coordinator); Jens Carsten Möller, MD (Universität Marburg, Germany, Site Investigator); Daniela Monza, MD (Fondazione IRCCS Istituto Neurologico Carlo Besta Milan, Italy, Language coordinator); Blas Morales, MD (Hospital General Yagüe Burgos Granada, Spain, Site Investigator); Laura V. Moreau (Hospital Universitario Virgen de la Arrixaca Murcia, Spain, Site Staff); Jose L. López-Sendón Moreno (Hospital Ramón y Cajal Madrid, Spain, Site Staff); Alexander Münchau, MD (Universitätsklinikum Hamburg-Eppendorf/Klinik und Poliklinik für, Germany, Site Investigator); Ann Murch (Leicestershire Partnership Trust Mill Lodge, UK, Site Staff); Jørgen E. Nielsen, MD, PhD (Hukommelsesklinikken Rigshospitalet Panum Institutet Copenhagen, Denmark, Steering Committee and Site Investigator); Anke Niess (Universitätsklinikum Ulm, Germany, Site Staff); Anne Nørremølle (Hukommelsesklinikken Rigshospitalet Panum Institutet Copenhagen, Denmark, Site Investigator); Marianne Novak (The National Hospital for Neurology and Neurosurgery, London, UK, Site Staff); Kristy

O'Donovan (The Royal Hallamshire Hospital/Sheffield Children's Hospital, UK, Site Staff); Michael Orth, MD, PhD (Universitätsklinikum Hamburg-Eppendorf/Klinik und Poliklinik für, Germany, Language coordinator); Daniela Otti (LKH Graz Abteilung für Psychiatrie, Austria, Site Staff); Michael Owen, PhD (The Institute of Medical Genetics/University Hospital of Wales, UK, Site Investigator); Helene Padieu (Centre de référence maladie de Huntington, Groupe Hospitalier Chenevier-Mondor, Créteil, France, Language coordinator); Marco Paganini (Universita' degli Studi di Firenze /Azienda Ospedaliera, Italy, Site Staff); Annamaria Painold (LKH Graz Abteilung für Psychiatrie, Austria, Site Staff); Markku Päiväranta (Finnish Parkinson Association, Finland, Steering Committee); Lucy Partington-Jones (Centre and Central Manchester University Hospitals NHS Foundation Trust University of Manchester/Manchester Academic Health Sciences, UK, Site Staff); Laurent Paterski (France, Language coordinator); Nicole Paterson (Cambridge Centre for Brain Repair, UK, Site Staff); Dawn Patino (Leicestershire Partnership Trust Mill Lodge, UK, Site Staff); Michael Patton (Leicestershire Partnership Trust Mill Lodge, UK, Site Staff); Alexander Peinemann (Klinikum rechts der Isar der Neurologischen Klinik und Poliklinik der Technischen Universität München, Germany, Site Staff); Nadia Peppà (The Royal Hallamshire Hospital/Sheffield Children's Hospital, UK, Language coordinator); Maria Fuensanta Noguera Perea (Hospital Universitario Virgen de la Arrixaca Murcia, Spain, Site Investigator); Maria Peterson (St. Georges-Hospital London, UK, Site Staff); Silvia Piacentini (Universita' degli Studi di Firenze /Azienda Ospedaliera, Italy, Site Investigator); Carla Piano (Istituto di Neurobiologia e Medicina Molecolare & Istituto di Scienze e Tecnologie della Cognizione /CNR Istituto di Neurologia Università Cattolica Roma, Italy, Site Staff); Regina Pons i Càrdenas (Hospital Mare de Deu de La Merced Barcelona, Spain, Site Staff); Christian Prehn (Huntington-Zentrum (NRW) Bochum im St. Josef-Hospital, Germany,

Site Staff); Kathleen Price (The Institute of Medical Genetics/University Hospital of Wales, UK, Site Staff); Daniela Probst (Universitätsklinikum Aachen Neurologische Klinik, Germany, Site Staff); Oliver Quarrell,MD, (The Royal Hallamshire Hospital/Sheffield Children's Hospital, UK, Site Investigator); Purificacion Pin Quiroga (Hospital Clínico Universitario San Carlos Madrid-Clinico, Spain, Site Staff); Tina Raab (Isar-Amper-Klinikum Taufkirchen, Germany, Site Staff); Maryla Rakowicz (Institute of Psychiatry and Neurology Warsaw-IPiN, Poland, Site Investigator); Ashok Raman (Castle Hill Hospital Hull, UK, Site Staff); Lucy Raymond (Cambridge Centre for Brain Repair, UK, Site Investigator); Ralf Reilmann (Universitätsklinikum Münster, Germany, Site Investigator); Gema Reinante (Hospital Universitario Virgen de la Arrixaca Murcia, Spain, Site Staff); Karin Reisinger (LKH Graz Abteilung für Psychiatrie, Austria, Site Staff); Lars Retterstøl (Oslo University Hospital (Ulleval), Norway, Site Staff); Pascale Ribaï,MD, (Institut de Pathologie et de Génétique Charleroi, Belgium, Site Investigator); Antonio V. Riballo (Hospital Mare de Deu de La Merced Barcelona, Spain, Site Staff); Guillermo G. Ribas (Hospital Ramón y Cajal Madrid, Spain, Site Staff); Sven Richter (Isar-Amper-Klinikum Taufkirchen, Germany, Site Staff); Hugh Rickards,MD, FRCP (The Barberry Centre Birmingham, UK, Site Investigator); Carlo Rinaldi (Azienda Ospedaliera Universitaria Federico II Naples, Italy, Site Staff); Ida Rissling (Universität Marburg, Germany, Site Staff); Stuart Ritchie,MB, ChB, MRCPsych (Abercromby Center Glasgow, UK, Site Investigator); Susana Vázquez Rivera (Hospital Clínico Universitario San Carlos Madrid-Clinico, Spain, Site Staff); Misericordia Floriach Robert (Hospital Mare de Deu de La Merced Barcelona, Spain, Site Staff); Elvira Roca (Hospital Mare de Deu de La Merced Barcelona, Spain, Site Staff); Silvia Romano (Istituto di Neurobiologia e Medicina Molecolare & Istituto di Scienze e Tecnologie della Cognizione /CNR Istituto di Neurologia

Università Cattolica Roma, Italy, Site Staff); Anna Maria Romoli (Universita' degli Studi di Firenze /Azienda Ospedaliera, Italy, Site Staff); Raymond A.C.Roos, MD (Leiden University Medical Centre, Netherlands, Steering Committee and Site Investigator); Niini Røren (formerly Heinonen) (Oslo University Hospital (Rikshospitalet), Norway, Language coordinator); Sarah Rose (St. Georges-Hospital London, UK, Site Staff); Elisabeth Rosser, FRCP (The National Hospital for Neurology and Neurosurgery, London, UK, Site Investigator); Anne Rosser, MRCP (The Institute of Medical Genetics/University Hospital of Wales, UK, Site Investigator); Fabiana Rossi (Azienda Ospedaliera Universitaria Federico II Naples, Italy, Site Staff); Jean Rothery (Scottish Huntington's Association Whyteman's Brae Hospital Fife, UK, Site Staff); Monika Rudzinska,MD, PhD (Krakowska Akademia Neurologii, Poland, Site Investigator); Pedro J. García Ruíz (Madrid-Fundación Jiménez Díaz, Spain, Site Investigator); Belan Garzon Ruíz (Hospital Mare de Deu de La Merced Barcelona, Spain, Site Staff); Cinzia Valeria Russo (Azienda Ospedaliera Universitaria Federico II Naples, Italy, Site Staff); Danuta Ryglewicz (Institute of Psychiatry and Neurology Warsaw-IPiN, Poland, Site Staff); Carston Saft (Huntington-Zentrum (NRW) Bochum im St. Josef-Hospital, Germany, Site Investigator); Elena Salvatore (Azienda Ospedaliera Universitaria Federico II Naples, Italy, Site Staff); Vicenta Sánchez (Madrid-Fundación Jiménez Díaz, Spain, Site Staff); Sigrid Botne Sando (St. Olavs Hospital Trondheim, Norway, Site Investigator); Pavla Šašinková (CzechRepublic, Language coordinator); Christian Sass (Universitätsklinikum Aachen Neurologische Klinik, Germany, Site Staff); Monika Scheibl (LKH Graz Abteilung für Psychiatrie, Austria, Site Staff); Johannes Schiefer (Universitätsklinikum Aachen Neurologische Klinik, Germany, Site Investigator); Christiane Schlangen (Universitätsklinikum Aachen Neurologische Klinik, Germany, Site Staff); Simone Schmidt, PhD (Universitätsklinikum Carl Gustav Carus an der Technischen Universität

Dresden/Klinik und Poliklinik für Neurologie Dresden, Germany, Site Staff); Helmut Schöggel (LKH Graz Abteilung für Psychiatrie, Austria, Site Staff); Caroline Schrenk (Isar-Amper-Klinikum Taufkirchen, Germany, Site Staff); Michael Schüpbach (Neurologische Klinik und Poliklinik/Zentrum für Bewegungsstörungen, Switzerland, Site Staff); Michele Schuierer (Isar-Amper-Klinikum Taufkirchen, Germany, Site Staff); Ana Rojo Sebastián (Hospital Mútua de Terrassa Barcelona, Spain, Steering Committee and Site Investigator); Amina Selimbegovic-Turkovic (Isar-Amper-Klinikum Taufkirchen, Germany, Site Staff); Justyna Sempolowicz (Medical University of Poznan, Poland, Site Staff); Mark Silva (Gloucestershire Royal Hospital, UK, Site Investigator); Emilia Sitek (St. Adalbert Hospital Gdansk; Medical University of Gdansk, Poland, Site Staff); Jaroslaw Slawek (St. Adalbert Hospital Gdansk; Medical University of Gdansk, Poland, Site Investigator); Julie Snowden (Centre and Central Manchester University Hospitals NHS Foundation Trust University of Manchester/Manchester Academic Health Sciences, UK, Site Investigator); Francesco Soleti (Istituto di Neurobiologia e Medicina Molecolare & Istituto di Scienze e Tecnologie della Cognizione /CNR Istituto di Neurologia Università Cattolica Roma, Italy, Site Staff); Paola Soliveri (Fondazione IRCCS Istituto Neurologico Carlo Besta Milan, Italy, Site Staff); Andrea Sollom (Centre and Central Manchester University Hospitals NHS Foundation Trust University of Manchester/Manchester Academic Health Sciences, UK, Site Staff); Witold Soltan (St. Adalbert Hospital Gdansk; Medical University of Gdansk, Poland, Site Investigator); Sandro Sorbi (Universita' degli Studi di Firenze /Azienda Ospedaliera, Italy, Site Investigator); Sven Asger Sørensen (Hukommelsesklinikken Rigshospitalet Panum Instituttet Copenhagen, Denmark, Site Staff); Maria Spadaro (Istituto di Neurobiologia e Medicina Molecolare & Istituto di Scienze e Tecnologie della Cognizione /CNR Istituto di Neurologia Università Cattolica Roma, Italy, Site

Staff); Michael Städtler (Klinikum rechts der Isar der Neurologischen Klinik und Poliklinik der Technischen Universität München, Germany, Site Staff); Christiane Stamm (Huntington-Zentrum (NRW) Bochum im St. Josef-Hospital, Germany, Site Staff); Tanja Steiner (Huntington-Zentrum (NRW) Bochum im St. Josef-Hospital, Germany, Site Staff); Jette Stokholm (Hukommelsesklippen Rigshospitalet Panum Institutet Copenhagen, Denmark, Site Staff); Bodil Stokke (Oslo University Hospital (Ullevål), Norway, Site Staff); Cheryl Stopford (Centre and Central Manchester University Hospitals NHS Foundation Trust University of Manchester/Manchester Academic Health Sciences, UK, Site Staff); Alexander Storch (Universitätsklinikum Carl Gustav Carus an der Technischen Universität Dresden/Klinik und Poliklinik für Neurologie Dresden, Germany, Site Investigator); Katrin Straßburger (Huntington-Zentrum (NRW) Bochum im St. Josef-Hospital, Germany, Site Staff); Lars Stubbe (Universitätsklinikum Hamburg-Eppendorf/Klinik und Poliklinik für, Germany, Site Staff); Anna Sulek (Institute of Psychiatry and Neurology Warsaw-IPiN, Poland, Site Staff); Andrzej Szczudlik, MD, PhD (Krakowska Akademia Neurologii, Poland, Site Investigator); Sarah Tabrizi, MD, PhD (The National Hospital for Neurology and Neurosurgery, London, UK, Steering Committee and Site Investigator); Rachel Taylor (The National Hospital for Neurology and Neurosurgery, London, UK, Site Coordinator); Santiago Duran-Sindreu Terol (Hospital Mare de Deu de La Merced Barcelona, Spain, Site Staff); Gareth Thomas (Scottish Huntington's Association Whyteman's Brae Hospital Fife, UK, Site Investigator); Jennifer Thompson (Centre and Central Manchester University Hospitals NHS Foundation Trust University of Manchester/Manchester Academic Health Sciences, UK, Site Investigator); Aileen Thomson (Gloucestershire Royal Hospital, UK, Site Investigator); Katherine Tidswell (The Royal Hallamshire Hospital/Sheffield Children's Hospital, UK, Site Staff); Maria M. Antequera Torres

(Hospital Universitario Virgen de la Arrixaca Murcia, Spain, Site Staff); Jean Toscano (Chapel Allerton Hospital Leeds, UK, Site Staff); Jenny Townhill (formerly Naji) (The Institute of Medical Genetics/University Hospital of Wales, UK, Language coordinator); Sonja Trautmann (Universitätsklinikum Ulm, Germany, Site Coordinator); Tecla Tucci (Azienda Ospedaliera Universitaria Federico II Naples, Italy, Site Staff); Katri Tuuha (Rehabilitation Centre Suvituuli Turku-Suvituuli, Finland, Site Staff); Tereza Uhrova,MD, PhD (Institute of Biology and Medical Genetics, First Faculty of Medicine, Charles University in Prague and General University Hospital in Prague, Czech Republic, Steering Committee); Anabela Valadas (Hospital de Santa Maria/Instituto de Medicina Molecular Lisbon, Portugal, Site Staff); Monique S.E. van Hout (Medisch Spectrum Twente Enschede, Netherlands, Site Staff); J.C.H. van Oostrom (Polikliniek Neurologie Groningen, Netherlands, Site Staff); Jeroen P.P. van Vugt, PhD (Medisch Spectrum Twente Enschede, Netherlands, Site Investigator); Marleen R. van Walsem, MSc (Oslo University Hospital (Rikshospitalet), Norway, Language coordinator); Wim Vandenberghe,MD, PhD (Department of Neurology, University Hospital Leuven, Belgium, Steering Committee); Christine Verellen-Dumoulin (Institut de Pathologie et de Génétique Charleroi, Belgium, Steering Committee and Site Investigator); Mar Ruiz Vergara (Hospital Mare de Deu de La Merced Barcelona, Spain, Site Staff); C.C.P. Verstappen, MD (Universitair Medisch Centrum St. Radboud Nijmegen, Netherlands, Site Investigator); Nichola Verstraelen (formerly Ritchie) (Centre and Central Manchester University Hospitals NHS Foundation Trust University of Manchester/Manchester Academic Health Sciences, UK, Site Coordinator); Celia Mareca Viladrich (Hospital Mare de Deu de La Merced Barcelona, Spain, Site Staff); Clara Villanueva (Hospital Clínico Universitario San Carlos Madrid-Clinico, Spain, Site Staff); Jan Wahlström,MD, PhD (Sahlgrenska University Hospital, Gothenburg, Sweden, Steering

Committee); Thomas Warner, FRCP (The National Hospital for Neurology and Neurosurgery, London, UK, Site Investigator); Raghild Wehus (Oslo University Hospital (Rikshospitalet), Norway, Site Staff); Adolf Weindl, MD (Klinikum rechts der Isar der Neurologischen Klinik und Poliklinik der Technischen Universität München, Germany, Site Investigator); Cornelius J. Werner, MD (Universitätsklinikum Aachen Neurologische Klinik, Germany, Site Staff); Leann Westmoreland (Centre and Central Manchester University Hospitals NHS Foundation Trust University of Manchester/Manchester Academic Health Sciences, UK, Site Staff); Patrick Weydt, MD (Universitätsklinikum Ulm, Germany, Site Investigator); Alexandra Wiedemann (Isar-Amper-Klinikum Taufkirchen, Germany, Site Staff); Edward Wild, MD (The National Hospital for Neurology and Neurosurgery, London, UK, Site Staff); Sue Wild (Chapel Allerton Hospital Leeds, UK, Site Staff); Marie-Noelle Witjes-Ané (Leiden University Medical Centre, Netherlands, Language coordinator); Grzegorz Witkowski (Institute of Psychiatry and Neurology Warsaw-IPiN, Poland, Site Investigator); Magdalena Wójcik, MD (Krakowska Akademia Neurologii, Poland, Site Investigator); Martin Wolz (Universitätsklinikum Carl Gustav Carus an der Technischen Universität Dresden/Klinik und Poliklinik für Neurologie Dresden, Germany, Site Investigator); Annett Wolz (Universitätsklinikum Carl Gustav Carus an der Technischen Universität Dresden/Klinik und Poliklinik für Neurologie Dresden, Germany, Site Staff); Jan Wright (The Barberry Centre Birmingham, UK, Site Staff); Pam Yardumian (Chapel Allerton Hospital Leeds, UK, Site Staff); Shona Yates (Scottish Huntington's Association Whyteman's Brae Hospital Fife, UK, Site Staff); Elizaveta Yudina (formerly Tarasova) (Huntington's Disease Society of Russia, Russia, Language coordinator); Jacek Zaremba (Institute of Psychiatry and Neurology Warsaw-IPiN, Poland, Steering Committee and Site Investigator); Sabine W. Zaugg (Neurologische Klinik und Poliklinik/Zentrum für Bewegungsstörungen, Switzerland, Site

Staff); Elzbieta Zdzenicka (Institute of Psychiatry and Neurology Warsaw-IPiN, Poland, Site Investigator); Daniel Zielonka, MD (Medical University of Poznan, Poland, Language coordinator); Euginiusz Zielonka (Medical University of Poznan, Poland, Language coordinator); Paola Zinzi (Istituto di Neurobiologia e Medicina Molecolare & Istituto di Scienze e Tecnologie della Cognizione /CNR Istituto di Neurologia Università Cattolica Roma, Italy, Site Investigator and Language coordinator); Simone Zittel (Universitätsklinikum Hamburg-Eppendorf/Klinik und Poliklinik für, Germany, Site Staff); Birgit Zucker (Universitätsklinik Freiburg, Germany, Site Investigator)

### **COHORT Co-investigators**

John Adams, MD (Centre for Addiction and Mental Health, Toronto, Canada, Site Investigator); Pinky Agarwal, MD (Booth Gardner Parkinson's Care Center, Kirkland, WA, USA, Site Investigator); Irina Antonijevic, MD (CHDI Foundation, Inc., USA, Steering Committee and Science Committee); Christopher Beck, PhD (University of Rochester, USA, Publications & Data Use Committee and Biostatistics/Coordination Center); Edmond Chiu, MD (The University of Melbourne, Australia, Site Investigator); Andrew Churchyard, MD (St Vincent's Aged Mental Health Service, Australia, Site Investigator); Amy Colcher, MD (University of Pennsylvania, USA, Site Investigator); Jody Corey-Bloom, MD, PhD (University of California, San Diego, USA, Site Investigator); Ray Dorsey, MD (Johns Hopkins University, USA, Publications & Data Use Committee (Co-Chair)); Carolyn Drazinic, MD (University of Connecticut, USA, Site Investigator); Richard Dubinsky, MD (University of Kansas Medical Center, USA, Site Investigator); Kevin Duff, PhD (University of Utah, USA, Site Investigator); Stewart Factor, DO (Emory University School of Medicine, Georgia, USA, Site Investigator); Tatiana Foroud, PhD

(Indiana University School of Medicine, USA, Steering Committee (Co-PI) and Publications and Data Use Committee); Sarah Furtado, MD, PhD (University of Calgary, Canada, Site Investigator); Joe Giuliano, BSN (CHDI Foundation, Inc., USA, Publications & Data Use Committee); Timothy Greenamyre, MD (University of Pittsburgh, USA, Site Investigator); Don Higgins, MD (Albany Medical College, USA, Site Investigator); Joseph Jankovic, MD (Baylor College of Medicine, Texas, USA, Site Investigator); Dana Jennings, MD (Institute for Neurogenerative Disorders, Connecticut, USA, Site Investigator); Un Jung Kang, MD (University of Chicago, USA, Site Investigator); Sandra Kostyk, MD (Ohio State University, USA, Site Investigator); Rajeev Kumar, MD (Colorado Neurological Institute, USA, Site Investigator); Blair Leavitt, MD (University of British Columbia, Canada, Site Investigator); Mark LeDoux, MD (University of Tennessee Health Science Center, USA, Site Investigator); William Mallonee, MD (Hereditary Neurological Disease Center, Kansas, USA, Site Investigator); Frederick Marshall, MD (University of Rochester, USA, Site Investigator); Eric Mohlo, MD (Albany Medical College, USA, Site Investigator); John Morgan, MD (Medical College of Georgia, USA, Site Investigator); David Oakes, PhD (University of Rochester, USA, Publications & Data Use Committee and Biostatistics/Coordination Center); Peter Panegyres, MBBS, PhD (Graylands, Selby-Lemnos & Special Care Health Services, Australia, Site Investigator); Michel Panisset, MD (Hôtel-Dieu, Hôpital-CHUM, Montreal, Canada, Site Investigator); Susan Perlman, MD (UCLA, USA, Site Investigator); Joel Perlmutter, MD (Washington University, USA, Site Investigator); Kimberly Quaid, PhD (Indiana University School of Medicine, USA, Site Investigator); Lynn Raymond, MD, PhD (University of British Columbia, Canada, Site Investigator); Fredy Revilla, MD (University of Cincinnati/Cincinnati Children's Hospital, USA, Site Investigator); Suzanne Robertson, PhD (University of Rochester,

USA, Biostatistics/Coordination Center); Bradley Robottom, MD (University of Maryland School of Medicine, USA, Site Investigator); Juan Sanchez-Ramos, MD (University of South Florida, USA, Site Investigator); Burton Scott, MD (Duke University Medical Center, USA, Site Investigator); Kathleen Shannon, MD (Rush University Medical Center, USA, Site Investigator); Ira Shoulson, MD (University of Rochester NY, USA, Steering Committee (PI)); Carlos Singer, MD (University of Miami, USA, Site Investigator); Samer Tabbal, MD (Washington University, USA, Site Investigator); Claudia Testa, MD,PhD (Emory University School of Medicine, Georgia, USA, Site Investigator); Dan van Kammen, MD (CHDI Foundation, Inc., USA, Steering Committee); Louise Vetter (Huntington's Disease Society of America, USA, Publications & Data Use Committee ); Francis Walker, MD (Wake Forest University School of Medicine, USA, Site Investigator); John Warner, PhD (CHDI Foundation, Inc., USA, Publications & Data Use Committee );William Weiner, MD (University of Maryland School of Medicine, USA, Site Investigator); Vicki Wheelock, MD (University of California, Davis, USA, Site Investigator); Olga Yastrubetskaya, PhD (The University of Melbourne, Australia, Site Investigator).

### **COHORT Contributors**

Stacey Barton, MSW (Washington University, USA, Site Staff); Janice Broyles, RN (University of Kansas Medical Center, USA, Site Staff); Ronda Clouse, RN (Columbia University Medical Center, USA, Site Staff); Allison Coleman, BSc (University of British Columbia, Canada, Site Staff); Robert Davis, MSN (University of Virginia, USA, Site Staff); Joji Decolongon, MSc (University of British Columbia, Canada, Site Staff); Jeanene DeLaRosa (University of Texas, USA, Site Staff); Lisa Deuel, BA (University of Rochester, USA, Biostatistics/Coordination

Center); Susan Dietrich (University of Virginia, USA, Site Staff); Hilary Dubinsky, BA (University of Kansas Medical Center, USA, Site Staff); Ken Eaton (University of Rochester, USA, Biostatistics/Coordination Center); Diane Erickson, RN (Colorado Neurological Institute, USA, Site Staff); Mary Jane Fitzpatrick, MS (University of Connecticut, USA, Site Staff); Steven Frucht, MD (Columbia University Medical Center, USA, Site Staff); Maureen Gartner, RN (University of Cincinnati/Cincinnati Children's Hospital, USA, Site Staff); Jody Goldstein, BS (University of California San Diego, USA, Site Staff); Jane Griffith, RN (Westmead Hospital, Australia, Site Staff); Charlyne Hickey, MS (University of Rochester, USA, Site Staff); Victoria Hunt, RN (Wake Forest University School of Medicine, USA, Site Staff); Jeana Jaglin, RN (Rush University Medical Center, USA, Site Staff); Mary Lou Klimek, MA, RN (University of Calgary, Canada, Site Staff); Pat Lindsay (University of Rochester, USA, Biostatistics/Coordination Center); Elan Louis, MD (Columbia University Medical Center, USA, Site Staff); Clemet Loy, MD (Westmead Hospital, Australia, Site Staff); Nancy Lucarelli, MA (University of Pittsburgh, USA, Site Staff); Keith Malarick, BA (Massachusetts General Hospital, USA, Site Staff); Amanda Martin (University of California Davis, USA, Site Staff); Robert McInnis, BA (Massachusetts General Hospital, USA, Site Staff); Carol Moskowitz, MS (Columbia University Medical Center, USA, Site Staff); Lisa Muratori, EDD (Columbia University Medical Center, USA, Site Staff); Frederick Nucifora, DO (Johns Hopkins University, USA, Site Staff); Christine O'Neill, BS (Wake Forest University School of Medicine, USA, Site Staff); Alicia Palao, MA (Baylor College of Medicine Texas, USA, Site Staff); Guerry Peavy, PhD (University of California San Diego, USA, Site Staff); Monica Quesada (University of Miami, USA, Site Staff); Amy Schmidt (Washington University, USA, Site Staff); Vicki Segro, MS (Colorado Neurological Institute, USA, Site Staff); Elaine Sperin, LPN (Emory University

School of Medicine, USA, Site Staff); Greg Suter, BA (Hereditary Neurological Disease Centre Kansas, USA, Site Staff); Kalo Tanev, MD (Massachusetts General Hospital, USA, Site Staff); Teresa Tempkin, RNC, MSN (University of California Davis, USA, Site Staff); Curtis Thiede, BS (University of California Los Angeles CA, USA, Site Staff); Paula Wasserman, MA (Columbia University Medical Center, USA, Site Staff); Claire Welsh (Johns Hopkins University, USA, Site Staff); Melissa Wesson, MS (Indiana University School of Medicine, USA, Site Staff); Elizabeth Zauber, MD (Indiana University School of Medicine, USA, Site Staff);
